# Supplementary material for: Vapour-based processing of hole-conductor-free CH3NH3PbI3 perovskite/C60 fullerene planar solar cells
Source: Royal Society of Chemistry journal article supplement (doi:10.1039/c4ra03820g), 2014-01-01
Supplement: c4ra03820g1.pdf [file c4ra03820g1.pdf]

## Electronic Supplementary Information

### **Vapour-based processing of hole-conductor-free CH<sub>3</sub>NH<sub>3</sub>PbI<sub>3</sub> perovskite/C<sub>60</sub> fullerene planar solar cells**

Hao Hu,<sup>a,c</sup> Dong Wang,<sup>a,c</sup> Yuanyuan Zhou,<sup>b</sup> Jiliang Zhang,<sup>d</sup> Siliu Lv,<sup>a</sup> Shuping Pang,<sup>a,\*</sup> Xiao Chen,<sup>a</sup> Zhihong Liu,<sup>a</sup> Nitin P. Padture,<sup>b</sup> Guanglei Cui<sup>a,\*</sup>

<sup>a</sup> Qingdao Key Lab of Solar Energy Utilization and Energy Storage Technology, Qingdao Institute of Bioenergy and Bioprocess Technology, Chinese Academy of Sciences, Qingdao 266101, P.R. China

E-mail: pangsp@qibebt.ac.cn; cuigl@qibebt.ac.cn

<sup>b</sup> School of Engineering, Brown University, Providence, RI 02912, USA

<sup>c</sup> University of Chinese Academy of Sciences, Beijing 100049, P. R. China

<sup>d</sup> Department of Physics and Materials Science, City University of Hong Kong, Hong Kong SAR

## **Experimental Procedure**

### Synthesis and Solar Cells Fabrication

CH<sub>3</sub>NH<sub>3</sub>I (or MAI) was prepared using the approach described in the literature [3]. Typically, 18 mL methylamine (40% in water, Sinopharm, China) and 30 mL of hydroiodic acid (45 wt% in water, Sinopharm, China) were mixed and reacted at 0 °C for 2 h while stirring. After rotary evaporation, the CH<sub>3</sub>NH<sub>3</sub>I powders was collected and washed three times and dried in a vacuum oven.

To prepare the MAPbI<sub>3</sub> thin film on a patterned indium tin oxide (ITO) coated glass substrates, the substrates were placed above the vapour sources with the ITO side facing down and 100 mg PbI<sub>2</sub> (Aladdin, China) was placed in a tungsten crucible. The distance between the crucible and the substrates was fixed at 20 cm. Once the pressure in the chamber was pumped down to below 5×10<sup>-3</sup> Torr, the crucible was heated using a current of ~45 A for 15 min to obtain a PbI<sub>2</sub> thin film on the ITO-coated glass substrates. Subsequently, 40 mg of the MAI was placed in another tungsten crucible and evaporated (~38 A, 15 min) to convert the PbI<sub>2</sub> into MAPbI<sub>3</sub> film *in situ*. The as-deposited film was then taken out and annealing at 100 °C for 30 min in the air. To complete the MAPbI<sub>3</sub>-C<sub>60</sub> bilayer solar cell, 10 nm C<sub>60</sub> layer and 50 nm Ag layer were successively evaporated onto the as-prepared MAPbI<sub>3</sub> film.

### Characterization

X-ray diffraction (XRD) patterns from the PbI<sub>2</sub> and the MAI<sub>3</sub> films were obtained using a microdiffractometer (D8-Advance, Bruker, Karlsruhe, Germany) with Cu K<sub>α</sub> radiation (λ=1.5406 Å) at 0.02° per step under operation condition of 30 kV and 40 mA. The structural analysis was conducted using the Topas 4.2 program. A scanning electron microscope (SEM; S-4800, Hitachi, Japan) was used to investigate the cross-sectional structure of the whole solar cell, and the surface morphologies of the PbI<sub>2</sub> and the MAI<sub>3</sub> films. The optical absorbance spectra of the MAPbI<sub>3</sub> perovskite film were measured using a UV-vis/NIR spectrophotometer (U-4100,

Hitachi, Japan).

### Solar Cells Testing

The  $J$ - $V$  responses of the solar cells (unmasked) were measured using an analyzer (2400 Series Sourcemeter, Keithley, Cleveland, OH) under simulated AM 1.5G sunlight at  $100 \text{ mW/cm}^2$  irradiation (Oriel Sol3A Class AAA Solar Simulator, Newport Corp., Irvine, CA). The exact light intensity was calibrated using the Newport Calibrated Reference Cell and Meter with KG3 window (Model 91150-KG3, Newport Corp., Irvine, CA). The active area of the solar cells was typically  $0.09 \text{ cm}^2$ , which is defined by the overlapping area of the ITO-coated glass and the Ag electrodes. There might be some overestimation of PCE due to the edge effects. [1, 2]

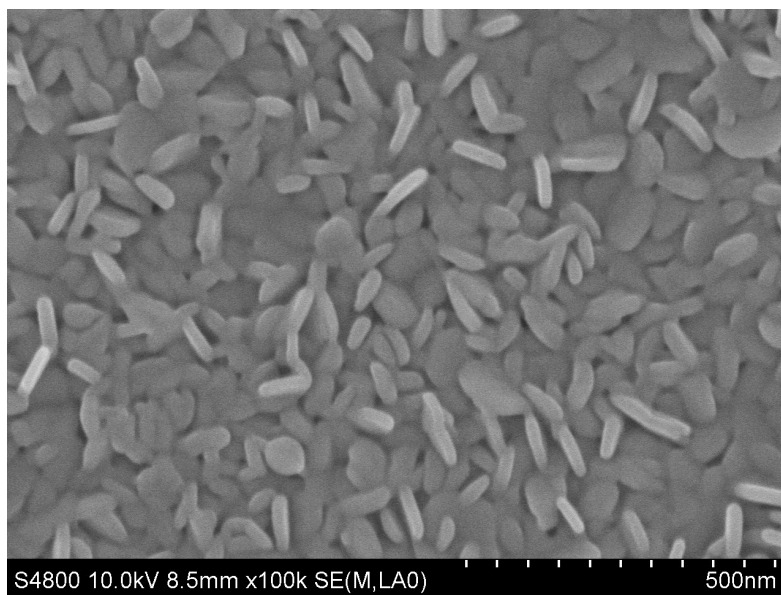

**Figure S1.** High-magnification SEM image (top view) of the vapor-deposited  $\text{PbI}_2$  film.

**Table S1.** Performance parameter results from the testing of ten different  $\text{MAPbI}_3$  perovskite/ $\text{C}_{60}$  fullerene solar cells.

|    | Voc  | Jsc   | FF   | Efficiency |
|----|------|-------|------|------------|
| 1  | 0.85 | 12.11 | 0.48 | 4.95       |
| 2  | 0.77 | 13.94 | 0.47 | 5.1        |
| 3  | 0.7  | 14.31 | 0.47 | 4.69       |
| 4  | 0.74 | 14.09 | 0.45 | 4.63       |
| 5  | 0.87 | 12.5  | 0.44 | 4.78       |
| 6  | 0.81 | 11.06 | 0.46 | 4.13       |
| 7  | 0.79 | 13.65 | 0.48 | 5.24       |
| 8  | 0.82 | 12.95 | 0.47 | 5.03       |
| 9  | 0.78 | 13.94 | 0.47 | 5.1        |
| 10 | 0.8  | 13.61 | 0.5  | 5.44       |

## References

- 1 H. S. Kim, I. Mora-Sero, V. Gonzalez-Pedro, F. Fabregat-Santiago, E. J. Juarez-Perez, N.-G. Park and J. Bisquert, *Nature Comm.* 2013, 4, 2242.
- 2 Q Wang, Y. C. Shao, Q. F. Dong, Z. G. Xiao, Y. B. Yuan, J. S. Huang, *Energy Environ. Sci.* 2014, (in press) DOI: 10.1039/C4EE00233D
